# Supplementary material
Source: publisher figshare collection journal article supplement (https://gsajournals.figshare.com/articles/dataset/_/8009426)
Supplement: Supplementary file [file 1]

**Table S1. Meiotic crossovers on chromosome 2L in *mei-218<sup>FL</sup>* and *mei-218<sup>ΔN</sup>*.**

| Interval       | <i>mei-218<sup>FL</sup></i> | <i>mei-218<sup>ΔN</sup></i> | Fold Change | <i>P</i> Value |
|----------------|-----------------------------|-----------------------------|-------------|----------------|
| <i>net-ho</i>  | 4.87 (1.53)                 | 5.9 (1.08)                  | 1.21        | n.s.           |
| <i>ho-dp</i>   | 5.79 (1.66)                 | 7.49 (1.21)                 | 1.29        | <0.0001        |
| <i>dp-b</i>    | 25.39 (3.1)                 | 21.87 (1.91)                | 0.86        | <0.0001        |
| <i>b-pr</i>    | 11.71 (2.29)                | 13.55 (1.58)                | 1.16        | n.s.           |
| <i>pr-cn</i>   | 6.32 (1.73)                 | 7.11 (1.18)                 | 1.13        | n.s.           |
| Total <i>n</i> | 759                         | 1815                        |             |                |

Crossover frequency shown as map units (centimorgans). Numbers in parentheses represent 95% confidence intervals. Fold change = *mei-218<sup>FL</sup>* / *mei-218<sup>ΔN</sup>*. *P* values determined by chi-squared tests. Figure 2 shows distributions for *mei-218<sup>FL</sup>* and *mei-218<sup>ΔN</sup>*.

**Table S2. Nondisjunction of *WT*, *rec<sup>-</sup> / rec<sup>+</sup>*, and *rec<sup>DA</sup> / rec<sup>+</sup>*.**

| Genotype                                  | XX females | XY males | XXY females | XO males | Total <i>n</i> | NDJ   |
|-------------------------------------------|------------|----------|-------------|----------|----------------|-------|
| <i>wild type (y w)</i>                    | 1551       | 1481     | 0           | 1        | <b>3034</b>    | 0.07% |
| <i>rec<sup>-</sup> / rec<sup>+</sup></i>  | 880        | 775      | 0           | 0        | <b>1655</b>    | 0%    |
| <i>rec<sup>DA</sup> / rec<sup>+</sup></i> | 1072       | 863      | 10          | 4        | <b>1963</b>    | 1.43% |

XX females and XY males are normal, whereas XXY females and XO males are karyotypes genotypes resulting from nondisjunction. Total *n* calculates in exceptional progeny that do not survive (XXX and XO).

**Supplemental Table S3. Crossovers in each interval on chromosome 2L for all mutants discussed.**

| Progeny        | Genotype Being Assayed |                |                             |                             |            |                         |                         |                                               |              |                       |                                    |                                    |            |                    |                                 |                                 |    |
|----------------|------------------------|----------------|-----------------------------|-----------------------------|------------|-------------------------|-------------------------|-----------------------------------------------|--------------|-----------------------|------------------------------------|------------------------------------|------------|--------------------|---------------------------------|---------------------------------|----|
|                | <i>WT</i>              | <i>mei-218</i> | <i>mei-218<sup>FL</sup></i> | <i>mei-218<sup>ΔN</sup></i> | <i>rec</i> | <i>rec<sup>KA</sup></i> | <i>rec<sup>DA</sup></i> | <i>rec<sup>DA</sup> /<br/>rec<sup>+</sup></i> | <i>mei-9</i> | <i>mei-9;<br/>rec</i> | <i>mei-9;<br/>rec<sup>KA</sup></i> | <i>mei-9;<br/>rec<sup>DA</sup></i> | <i>Blm</i> | <i>Blm<br/>rec</i> | <i>Blm<br/>rec<sup>KA</sup></i> | <i>Blm<br/>rec<sup>DA</sup></i> |    |
| Parental       | 2376                   | 1693           | 396                         | 942                         | 2129       | 1061                    | 3452                    | 1597                                          | 2366         | 490                   | 3650                               | 1360                               | 844        | 705                | 684                             | 445                             |    |
| SCO            | 1 ( <i>net-ho</i> )    | 176            | 4                           | 24                          | 75         | 8                       | 54                      | 3                                             | 73           | 6                     | 0                                  | 7                                  | 0          | 23                 | 31                              | 27                              | 13 |
|                | 2 ( <i>ho-dp</i> )     | 290            | 6                           | 33                          | 93         | 10                      | 100                     | 5                                             | 137          | 11                    | 3                                  | 13                                 | 1          | 22                 | 29                              | 35                              | 10 |
|                | 3 ( <i>dp-b</i> )      | 1099           | 16                          | 168                         | 315        | 53                      | 464                     | 29                                            | 679          | 40                    | 11                                 | 43                                 | 5          | 89                 | 136                             | 116                             | 98 |
|                | 4 ( <i>b-pr</i> )      | 154            | 18                          | 65                          | 168        | 13                      | 94                      | 12                                            | 201          | 8                     | 5                                  | 20                                 | 5          | 104                | 103                             | 95                              | 78 |
|                | 5 ( <i>pr-cn</i> )     | 39             | 7                           | 29                          | 80         | 20                      | 44                      | 6                                             | 30           | 2                     | 2                                  | 19                                 | 4          | 61                 | 87                              | 78                              | 64 |
| DCO            | 1 and 2                | 1              | 0                           | 0                           | 0          | 0                       | 0                       | 0                                             | 0            | 0                     | 0                                  | 0                                  | 0          | 1                  | 0                               | 4                               | 0  |
|                | 1 and 3                | 11             | 0                           | 3                           | 13         | 0                       | 7                       | 0                                             | 4            | 0                     | 0                                  | 0                                  | 0          | 4                  | 11                              | 4                               | 0  |
|                | 1 and 4                | 10             | 0                           | 4                           | 11         | 0                       | 4                       | 0                                             | 2            | 0                     | 0                                  | 0                                  | 0          | 2                  | 7                               | 0                               | 3  |
|                | 1 and 5                | 2              | 0                           | 6                           | 8          | 0                       | 0                       | 0                                             | 2            | 0                     | 0                                  | 0                                  | 0          | 1                  | 0                               | 3                               | 2  |
|                | 2 and 3                | 6              | 0                           | 3                           | 13         | 0                       | 3                       | 0                                             | 3            | 0                     | 0                                  | 0                                  | 0          | 1                  | 5                               | 1                               | 6  |
|                | 2 and 4                | 7              | 0                           | 6                           | 18         | 0                       | 1                       | 0                                             | 9            | 0                     | 0                                  | 0                                  | 0          | 2                  | 7                               | 5                               | 2  |
|                | 2 and 5                | 13             | 0                           | 1                           | 12         | 0                       | 2                       | 0                                             | 3            | 0                     | 0                                  | 0                                  | 0          | 2                  | 2                               | 1                               | 4  |
|                | 3 and 4                | 19             | 0                           | 10                          | 38         | 0                       | 14                      | 0                                             | 14           | 0                     | 0                                  | 0                                  | 0          | 5                  | 19                              | 5                               | 18 |
|                | 3 and 5                | 17             | 0                           | 8                           | 18         | 0                       | 4                       | 0                                             | 7            | 0                     | 0                                  | 0                                  | 0          | 7                  | 21                              | 17                              | 12 |
|                | 4 and 5                | 2              | 0                           | 2                           | 11         | 0                       | 3                       | 0                                             | 3            | 0                     | 0                                  | 0                                  | 0          | 2                  | 8                               | 9                               | 10 |
| TCO            | 0                      | 0              | 1                           | 0                           | 0          | 0                       | 0                       | 0                                             | 0            | 0                     | 0                                  | 0                                  | 1          | 10                 | 7                               | 7                               |    |
| Total <i>n</i> | 4222                   | 1744           | 759                         | 1815                        | 2233       | 1855                    | 3507                    | 2764                                          | 2433         | 511                   | 3752                               | 1375                               | 1171       | 1181               | 1091                            | 774                             |    |

Each row shows the number of parental (P), single (SCO), double (DCO), and triple (TCO) crossovers for each genotype and each mutant discussed in the article. Total *n* represents all parental and recombinant flies scored for each genotype. Wild-type data are from Hatkevich *et al.* 2017. Data for *mei-218 Blm*, and *Blm rec* are from Kohl, Jones, and Sekelsky 2012. The *mei-9; rec* experiment had six apparent double crossovers and one triple crossovers. Because all of these were *b pr<sup>+</sup> cn* and no multiple crossover events were observed in the 2.7x larger dataset of Blanton *et al.* (2005), we suspect these were from some non-meiotic event(s); these flies were therefore removed from this analysis.
